# Supplementary material
Source: publisher figshare collection journal article supplement (https://tandf.figshare.com/articles/dataset/_/14912458)

A)

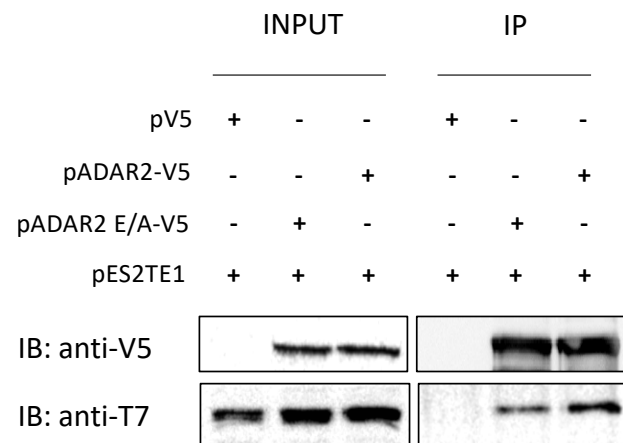

B)

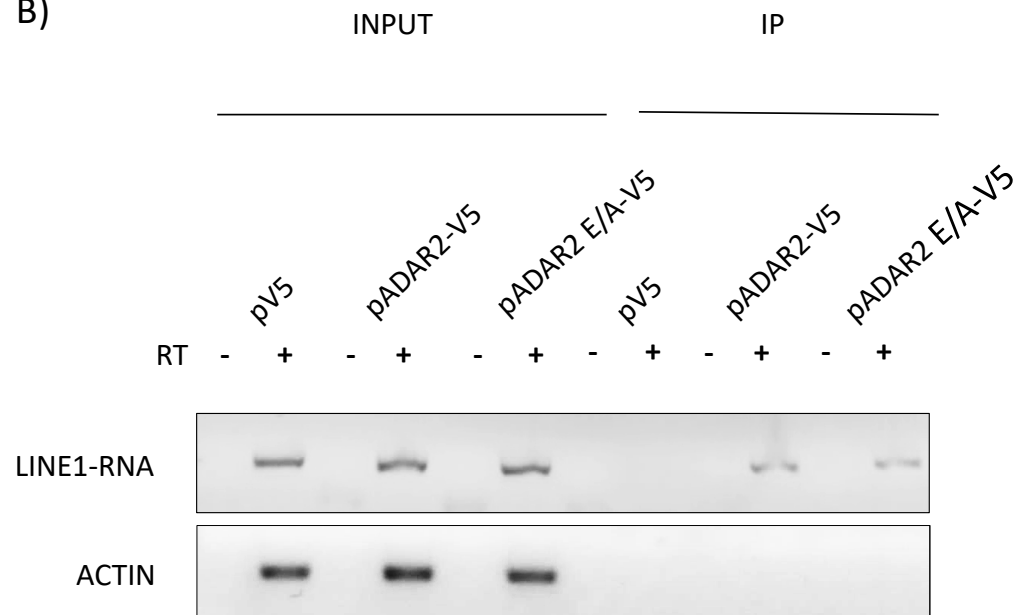

C)

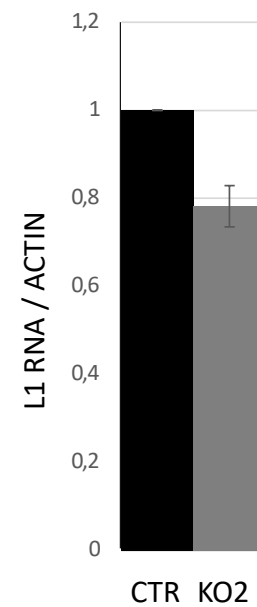

Supplement: Supplementary file 1 [file 1]

A)

ORF1p-T7

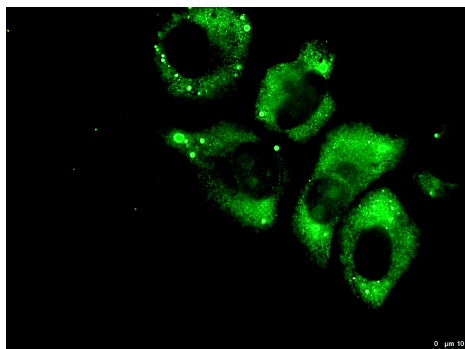

DAPI

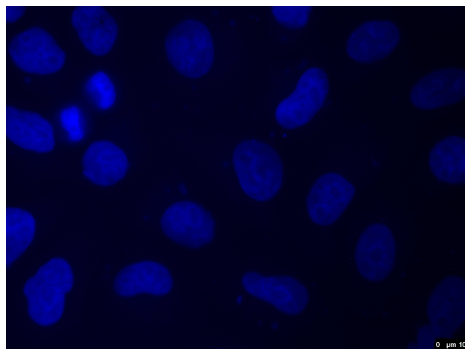

MERGED

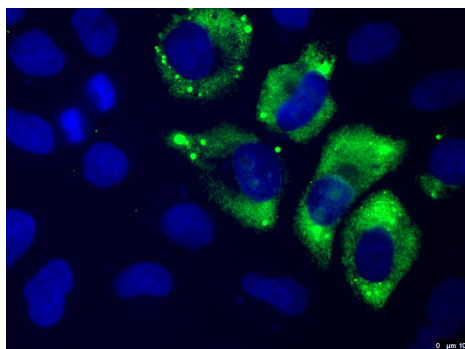

B)

ADAR2-V5

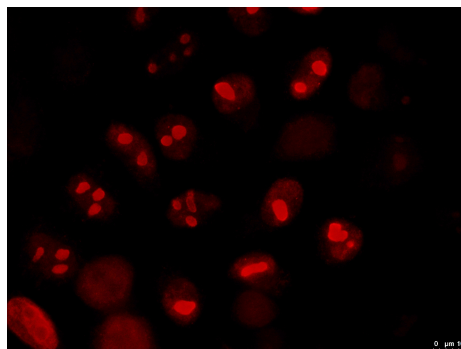

DAPI

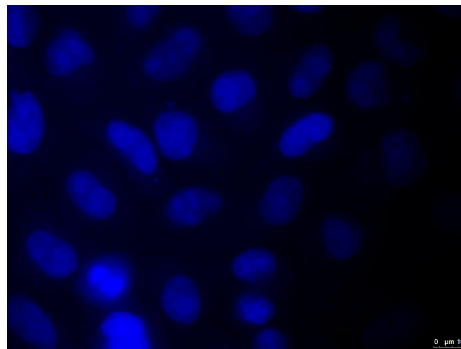

MERGED

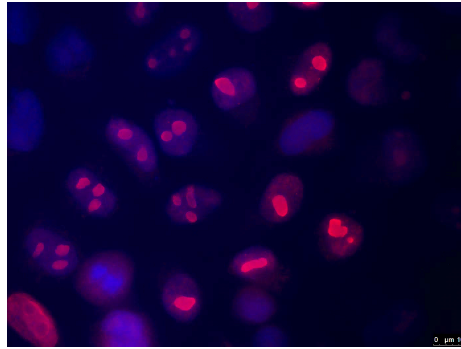

C)

ADAR2 E/A-V5

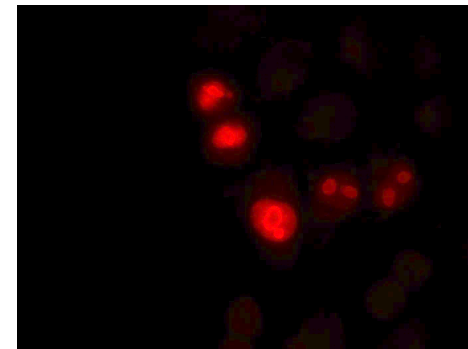

DAPI

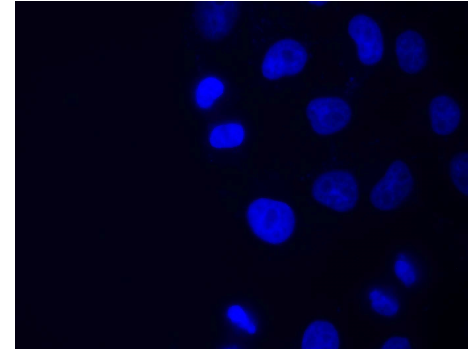

MERGED

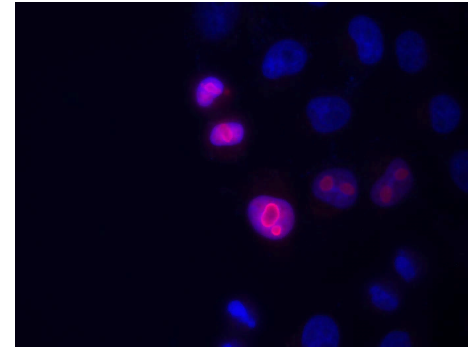

Supplement: Supplementary file 2 [file 1]
